# Supplementary material
Source: publisher figshare collection journal article supplement (https://frontiersin.figshare.com/ndownloader/files/18135788)
Supplement: Supplementary file 1 [file 18135788]

## Sheet: Primers, PCR mix and condition
1. Sequence of primers
Application	Primer name		5'-3' primer sequence
	Diat_rbcL_708F_1	foward	AGGTGAAGTAAAAGGTTCWTACTTAAA
Primers used to amplify the	Diat_rbcL_708F_2	foward	AGGTGAAGTTAAAGGTTCWTAYTTAAA
312bp rbcL fragment for	Diat_rbcL_708F_3	foward	AGGTGAAACTAAAGGTTCWTACTTAAA
diatom metabarcoding	R3_1	reverse	CCTTCTAATTTACCWACWACTG
	R3_2	reverse	CCTTCTAATTTACCWACAACAG
	Diat_rbcL_708F_1_tail	foward	CTTTCCCTACACGACGCTCTTCCGATCTAGGTGAAGTAAAAGGTTCWTACTTAAA
Tailed primers used in this	Diat_rbcL_708F_2_tail	foward	CTTTCCCTACACGACGCTCTTCCGATCTAGGTGAAGTTAAAGGTTCWTAYTTAAA
study during the PCR1 step	Diat_rbcL_708F_3_tail	foward	CTTTCCCTACACGACGCTCTTCCGATCTAGGTGAAACTAAAGGTTCWTACTTAAA
for HTS library preparation	R3_1_tail	reverse	GGAGTTCAGACGTGTGCTCTTCCGATCTCCTTCTAATTTACCWACWACTG
	R3_2_tail	reverse	GGAGTTCAGACGTGTGCTCTTCCGATCTCCTTCTAATTTACCWACAACAG
2. PCR Mix composition
Reagents	Units	[Initial]	[Final]	Volume per PCR reacion (µL)
H2O	-	-	-	15.6
Buffer	X	10	1	2.5
dNTP	mM	2.5	0.2	2
BSA	mg/mL	10	0.5	1.25
Primer F: 708F (1-2-3)	pmol/µL	10	0.5	1.25
Primer R: R3 (1-2)	pmol/µL	10	0.5	1.25
Taq (TakaraLA Taq)	U/µL	5	0.75	0.15
3. PCR reaction condition
Temperature (°C)	Time (minutes)	Cycles
95 °C	5 min	-
95 °C	1 min
54 °C	1 min	33 times
72 °C	1 min
72 °C	5 min	-
10 °C	pause	-
